# Supplementary material for: A catalogue of recombination coldspots in interspecific tomato hybrids
Source: PLOS journal article supplement (doi:10.1371/journal.pgen.1011336), 2024-07-01
Supplement: S9 (10.1371/journal.pgen.1011336.s009) [file journal.pgen.1011336.s009.pdf]

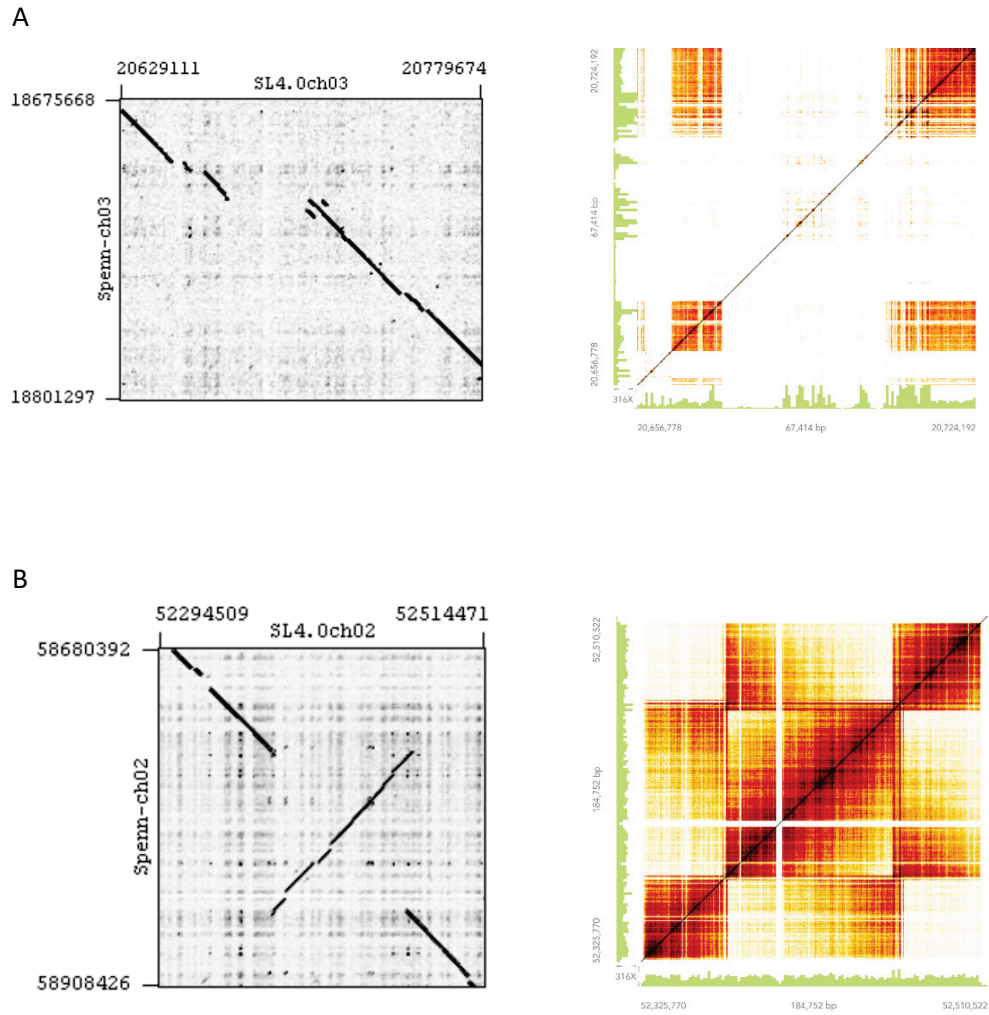

**S4 Fig. Validation of structural variants.** Examples of a (A) deletion and an (B) inversion that are validated by manual inspection. First, through dot plots between the assemblies of *S. lycopersicum* c.v. Heinz 1706 and *S. pennellii* genomes generated using *Gepard* (left). Second, through heatmap of overlapping barcodes between linked reads (10X Genomics) in the *S. pennellii* parental genome generated using *Loupe Browser*. The patterns in the top right and bottom right Figs characterize a deletion and an inversion, respectively.
